# Supplementary material
Source: publisher figshare collection journal article supplement (https://acs.figshare.com/ndownloader/files/3712852)
Supplement: Supplementary file 1 [file 3712852]

## Supporting Information

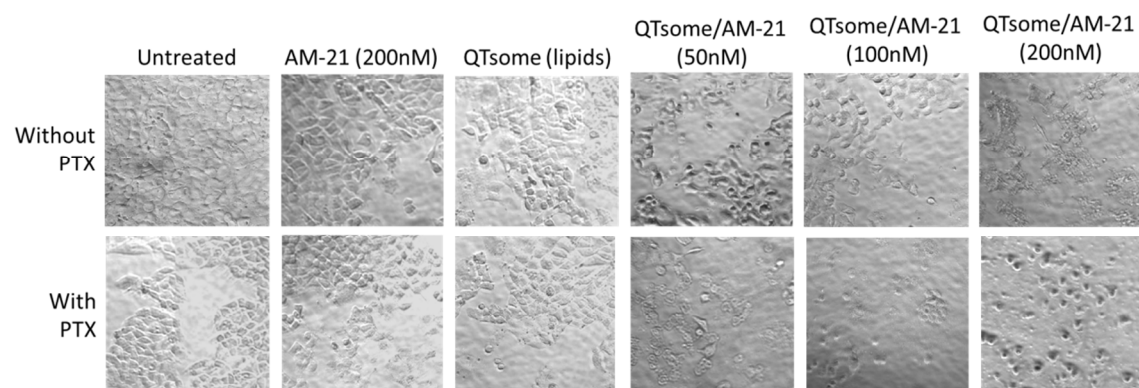

Supplemental Figure 1. Changes in cell morphology following treatment with QT/AM-21 alone or in combination with PTX were imaged under light microscope. While high concentrations of QT/AM-21 were evidenced by moderate morphological change, combinations of QT/AM-21 and PTX resulted in the greatest percentage of cell death.
